# Supplementary material for: An efficient photocatalysis-self-Fenton system based on Fe(ii)-MOF/g-C3N4for direct hydroxylation of benzene to phenol
Source: Royal Society of Chemistry journal article supplement (doi:10.1039/d3ma00235g), 2023-01-01
Supplement: d3ma00235g1.pdf [file d3ma00235g1.pdf]

## Supporting Information

### An Efficient Photocatalysis-self-Fenton System based on Fe(II)-MOFs/g-C<sub>3</sub>N<sub>4</sub> for Direct Hydroxylation of Benzene to Phenol

Xu Jia <sup>\*1</sup>, Xuotong Xu <sup>1</sup>, Cong Liu <sup>1</sup>, Fuying Wang <sup>1</sup>, Liuxue Zhang <sup>\*1</sup>,  
Shuyan Jiao <sup>\*1</sup>, Genxing Zhu, Guomin Yu <sup>1</sup>, Xiulian Wang <sup>2</sup>

<sup>1</sup> School of Materials and Chemical Engineering, Zhongyuan University of Technology, Zhengzhou, 450007, PR China

<sup>2</sup> School of Energy and Environment, Zhongyuan University of Technology, Zhengzhou, 450007, PR China

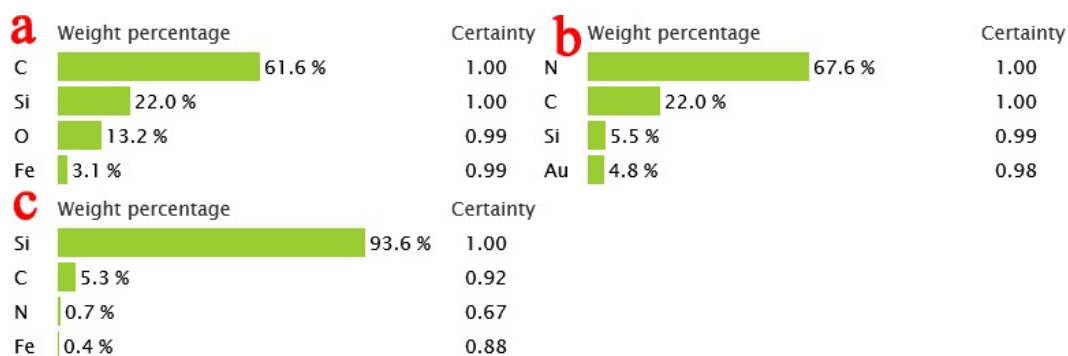

**Fig. S1** EDS images of (a) Fe(II)-MOF, (b) layered g-C<sub>3</sub>N<sub>4</sub> and (c) Fe(II)-MOF/g-C<sub>3</sub>N<sub>4</sub>

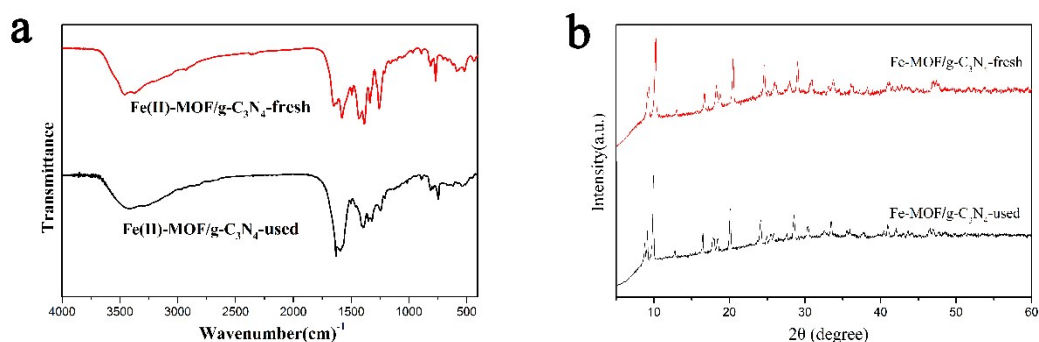

**Fig. S2** Infrared spectra (a) and XRD patterns (b) of Fe(II)-MOF/g-C<sub>3</sub>N<sub>4</sub>-fresh and Fe(II)-MOF/g-C<sub>3</sub>N<sub>4</sub>-used.

<sup>1</sup> Corresponding author. Email address: [jiax@zut.edu.cn](mailto:jiax@zut.edu.cn) (Xu Jia); [zhanglx@zut.edu.cn](mailto:zhanglx@zut.edu.cn) (Liuxue Zhang); [jiaosy@zut.edu.cn](mailto:jiaosy@zut.edu.cn) (Shuyan Jiao).  
Tel.: +86 -731-62506699; Fax: +86-731-62506095
